patients or those requiring positive end expiratory pressure, even small leaks can be dangerous.

The simple solution is for the anesthesiologist to empty the cuff at the end of the case and replace the gas with room air.

BRIAN L. PARTRIDGE, M.D., D.PHIL.  
Assistant Professor of Anesthesiology  
Department of Anesthesiology

Anesthesiology  
68:168, 1988

### Is Metocurine Better?

*To the Editor:*—The finding by Stirt *et al.*<sup>1</sup> that pretreatment of patients with a small "defasciculating" dose of metocurine could prevent increases in ICP induced by succinylcholine (Sch) is of particular interest to anesthesiologists who frequently care for patients with compromised intracranial compliance. However, in many centers, the use of metocurine is declining, and some hospitals are removing it from their formularies, thus decreasing its availability for use. Unfortunately, the efficacy of the various non-depolarizing muscle relaxants varies with respect to their ability to prevent some of the undesirable effects of succinylcholine,<sup>2-4</sup> so that this finding with metocurine cannot be extended to other agents without specific testing.

Another issue, as recognized by Stirt *et al.*, is the fact that airway manipulation, intubation, etc., can all raise ICP, and attention must be given to these other sources of intracranial hypertension. With this in mind, pancuronium, or other non-depolarizing relaxants, may still be preferred over the metocurine-succinylcholine combination. In work reported by McLeskey *et al.*,<sup>5</sup> four patients given 3 mg of d-tubocurarine for defasciculation followed by succinylcholine had either no change or a decrease in ICP 1 min after succinylcholine administration, but two of the four had increases in ICP greater than 9 mmHg during tracheal intubation. In contrast, none of the eight patients given pancuronium (0.1 mg/kg) had increases in ICP of more than 9 mmHg during intubation (one had an increase to 8 mmHg). These data suggest that pancuronium may help mitigate ICP changes during intubation, which succinylcholine, even after defasciculation, may not do. The fact that pancuronium decreases the MAC of halothane<sup>6</sup> and, possibly, of other agents may help account for its

Anesthesiology  
68:168-169, 1988

*In Reply:*—We thank Dr. Young and her group for their interest in our paper,<sup>1</sup> and would offer two comments.

University of California Medical Center  
225 Dickinson Street  
San Diego, California 92103

### REFERENCE

1. Stanley TH, Kawamura R, Graves C: Effects of nitrous oxide on volume and pressure of endotracheal tube cuffs. *ANESTHESIOLOGY* 41:256, 1974

(Accepted for publication September 17, 1987.)

effect during intubation. However, the multiple, closely spaced manipulations carried out by McLeskey *et al.* make this suggestion speculative rather than definitive, and indicate the need for further work.

MARIE L. YOUNG, M.D.  
DAVID L. SMITH, M.D., PH.D.  
ROGER J. BAGSHAW, M.D.  
MARC J. BLOOM, M.D., PH.D.  
Division of Neurosurgical Anesthesia  
Department of Anesthesia  
Hospital of the University of Pennsylvania  
Philadelphia, Pennsylvania 19104

### REFERENCES

1. Stirt JA, Grosslight KR, Bedford RE, Vollmer D: "Defasciculation" with metocurine prevents succinylcholine-induced increases in intracranial pressure. *ANESTHESIOLOGY* 67:50-53, 1987
2. Cullen DJ: The effect of pretreatment with nondepolarizing muscle relaxants on the neuromuscular blocking action of succinylcholine. *ANESTHESIOLOGY* 35:572-578, 1971
3. Brodsky JB, Brock JG, Samuels SI: Pancuronium pretreatment and post-succinylcholine myalgias. *ANESTHESIOLOGY* 51:259-261, 1979
4. Blitt CD, Carlson GL, Rolling GD, Hameroff SR, Otto CW: A comparative evaluation of pretreatment with nondepolarizing neuromuscular blockers prior to the administration of succinylcholine. *ANESTHESIOLOGY* 55:687-689, 1981
5. McLeskey CH, Cullen BF, Kennedy RD, Galindo A: Control of cerebral perfusion pressure during induction of anesthesia in high risk neurosurgical patients. *Anesth Analg* 53:985-992, 1974
6. Forbes AR, Cohen NH, Eger EI: Pancuronium reduces halothane requirement in man. *Anesth Analg* 58:497-499, 1979

(Accepted for publication September 17, 1987.)

First, it is indeed true that the availability of metocurine, like that of gallamine, is decreasing, lessening its use even where it might be indicated. Thus, the anes-

thesiologist who chooses to safely employ succinylcholine with pretreatment in the neurosurgical patient population is faced with a dilemma, since no studies have evaluated the use of relaxants other than metocurine for pretreatment in a rigorously controlled fashion. However, we would predict, based on our clinical experience with each of the nondepolarizing relaxants as pretreatment agents prior to succinylcholine in the neurosurgical patient population, that 1 ml of any of the currently available nondepolarizing relaxants would serve equally well as protection against succinylcholine-induced intracranial pressure (ICP) increases.

Second, the effect of pancuronium on ICP has been explored in the clinical arena,<sup>2</sup> but not in a carefully controlled fashion, as Dr. Young *et al.* note. For example, patients in the study alluded to<sup>2</sup> received thiopental doses of 450–800 mg and were hyperventilated with 1% enflurane, making the effects of pancuronium itself on ICP rather hard to discern.

To attempt to protect against increased ICP during intubation by using pancuronium for muscle relaxation as opposed to other, newer nondepolarizing agents would be less than ideal. While pancuronium may not adversely affect ICP, its sympathomimetic effects in intubating doses may be undesirable. Atracurium<sup>3,4</sup> or vecuronium<sup>5</sup> have been shown to be without significant effects on ICP, blood pressure, and heart rate in neuro-

surgical patients at risk for ICP increases, and might be preferable alternatives.

JOSEPH A. STIRT, M.D.  
KENNETH R. GROSSLIGHT, M.D.  
ROBERT F. BEDFORD, M.D.  
DENNIS VOLLMER, M.D.  
*Department of Anesthesiology  
University of Virginia Medical Center  
Charlottesville, Virginia 22908*

#### REFERENCES

1. Stirt JA, Grosslight KR, Bedford RF, Vollmer D: "Defasciculation" with metocurine prevents succinylcholine-induced increases in intracranial pressure. *ANESTHESIOLOGY* 67:50–53, 1987
2. McClesky CH, Cullen BF, Kennedy RD, Galindo A: Control of cerebral perfusion pressure in high-risk neurosurgical patients. *Anesth Analg* 53:984–992, 1976
3. Minton MD, Stirt JA, Bedford RF, Haworth C: Intracranial pressure after atracurium in neurosurgical patients. *Anesth Analg* 64:1113–1116, 1985
4. Rosa G, Orfei P, Sanfilippo M, Vilardi V, Gasparetto A: The effect of atracurium besylate (Tracrium) on intracranial pressure and cerebral perfusion pressure. *Anesth Analg* 65:381–384, 1986
5. Stirt JA, Maggio W, Haworth C, Minton MD, Bedford RF: Vecuronium: Effect on intracranial pressure and hemodynamics in neurosurgical patients. *ANESTHESIOLOGY* 1987 (in press)

(Accepted for publication September 17, 1987.)

### Separating the Lungs of Dogs without Obstructing the Right Upper Lobe Bronchus

*To the Editor:*—Doctors Muneyuki, Konishi, Yada, and Kinoshita have recently shown that the bronchial orifice of the right upper lobe originates above the level of the tracheal carina in the majority of dogs.<sup>1</sup> This anatomical feature precludes separation of the two canine lungs with any currently commercially available human or canine double-lumen tube without obstructing the right upper lobe. These authors are to be congratulated for recognizing this technical difficulty, designing a special double-lumen tube to eliminate the difficulty, and successfully testing their double-lumen tube. This is an important advance, because I believe that few physicians conducting research in this area are aware that this problem or a solution to it exist.

I recognized this problem in previous open-chested canine experiments and devised an alternative method of separating the two lungs without obstructing the right upper lobe bronchus. A single-lumen tube is placed into the trachea and advanced until the tip of the tube is palpated, from within the chest, to be just into

the left mainstem bronchus (proximal to the left upper lobe). A ligature is placed around the left mainstem bronchus and single-lumen tube, and tightly tied around both structures. A second single-lumen tube is placed high in the trachea and used to ventilate the right lung. The ligature separates the two lungs, eliminates the need for potentially obstructing balloons, eliminates the need for hand-fashioning a special double-lumen tube, and works 100% of the time.

JONATHAN L. BENUMOF, M.D.  
*Professor of Anesthesia  
Anesthesia Research Laboratory, T-001  
University of California, San Diego  
La Jolla, California 92093*

#### REFERENCE

1. Muneyuki M, Konishi K, Kazuhiko Y, Kinoshita H: A tracheal divider for differential lung ventilation in dogs. *ANESTHESIOLOGY* 66:856–857, 1987

(Accepted for publication September 18, 1987.)
